# Supplementary material for: Apolipoprotein-mediated regulation of lipid metabolism induces distinctive effects in different types of breast cancer cells
Source: PubMed Central journal article supplement (PMC7178965; doi:10.1186/s13058-020-01276-9), 2020-04-22

## A. MCF-7

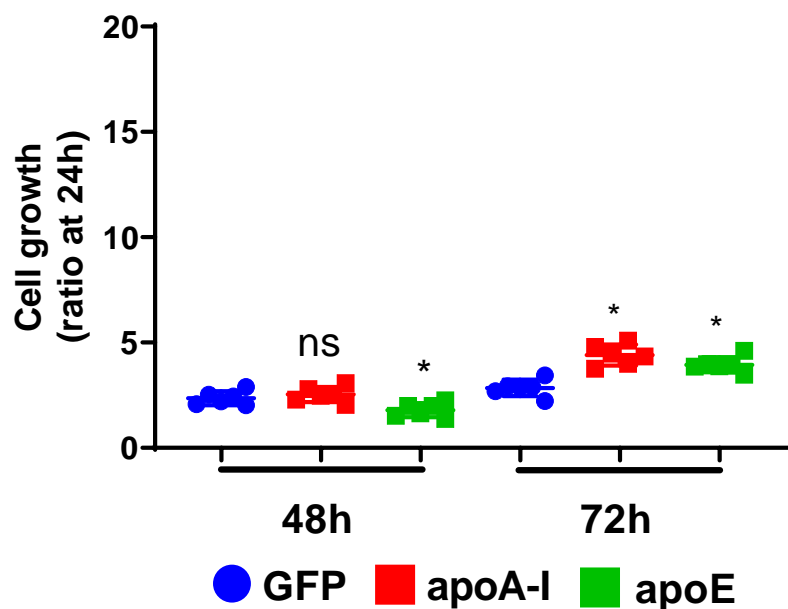

## B. MDA-MB-231

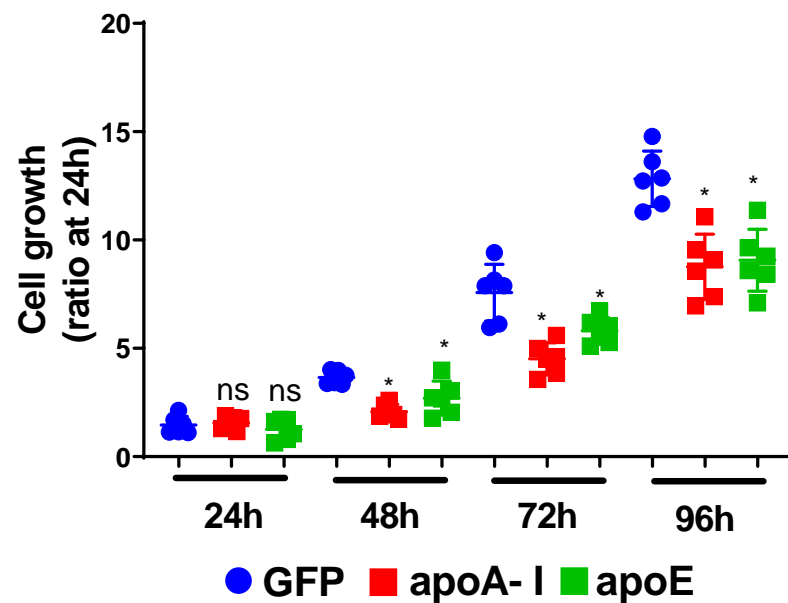

Supplement: 13058_2020_1276_MOESM2_ESM.pdf [file 13058_2020_1276_MOESM2_ESM.pdf]
